# Supplementary material for: Effect of praziquantel on the differential expression of mouse hepatic genes and parasite ATP binding cassette transporter gene family members during Schistosoma mansoni infection
Source: PubMed Central journal article supplement (PMC5501684; doi:10.1371/journal.pntd.0005691), 2017-06-26
Supplement: pntd.0005691.s012.pdf [file pntd.0005691.s012.pdf]

**S4 Table. Summary of Illumina read counts for each sequenced sample.**

| Sample                                  | Total Reads<br>Quality-trimmed<br>reads (Q > 20) | <i>Mus musculus</i><br>Total mapped<br>reads (%) | <i>Schistosoma<br/>mansoni</i><br>Total mapped<br>reads (%) |
|-----------------------------------------|--------------------------------------------------|--------------------------------------------------|-------------------------------------------------------------|
| Mouse liver<br>Sm_Vh_32<br>replicate 1  | 25,620,124                                       | 89.65%                                           | 0.14%                                                       |
| Mouse liver<br>Sm_Vh_32<br>replicate 2  | 22,252,855                                       | 89.47%                                           | 0.16%                                                       |
| Mouse liver<br>Sm_Vh_32<br>replicate 3  | 25,081,458                                       | 89.56%                                           | 0.10%                                                       |
| Mouse liver<br>Sm_Vh_35<br>replicate 1  | 24,891,081                                       | 89.80%                                           | 0.17%                                                       |
| Mouse liver<br>Sm_Vh_35<br>replicate 2  | 24,081,593                                       | 88.61%                                           | 0.11%                                                       |
| Mouse liver<br>Sm_Vh_35<br>replicate 3  | 23,519,336                                       | 89.14%                                           | 0.10%                                                       |
| Mouse liver<br>Sm_Vh_39<br>replicate 1  | 25,877,298                                       | 89.86%                                           | 0.09%                                                       |
| Mouse liver<br>Sm_Vh_39<br>replicate 2  | 24,571,558                                       | 89.45%                                           | 0.09%                                                       |
| Mouse liver<br>Sm_Vh_39<br>replicate 3  | 25,883,964                                       | 89.51%                                           | 0.04%                                                       |
| Mouse liver<br>Sm_Vh_46<br>replicate 1  | 24,289,752                                       | 89.55%                                           | 0.08%                                                       |
| Mouse liver<br>Sm_Vh_46<br>replicate 2  | 22,702,480                                       | 89.04%                                           | 0.09%                                                       |
| Mouse liver<br>Sm_Vh_46<br>replicate 3  | 23,443,615                                       | 88.23%                                           | 0.06%                                                       |
| Mouse liver<br>Sm_PZQ_32<br>replicate 1 | 22,604,127                                       | 89.60%                                           | 0.07%                                                       |

| Sample                                  | Total Reads<br>Quality-trimmed<br>reads (Q > 20) | <i>Mus musculus</i><br>Total mapped<br>reads (%) | <i>Schistosoma<br/>mansoni</i><br>Total mapped<br>reads (%) |
|-----------------------------------------|--------------------------------------------------|--------------------------------------------------|-------------------------------------------------------------|
| Mouse liver<br>Sm_PZQ_32<br>replicate 2 | 24,752,867                                       | 90.12%                                           | 0.05%                                                       |
| Mouse liver<br>Sm_PZQ_32<br>replicate 3 | 25,486,684                                       | 89.57%                                           | 0.08%                                                       |
| Mouse liver<br>Sm_PZQ_35<br>replicate 1 | 25,052,120                                       | 89.91%                                           | 0.03%                                                       |
| Mouse liver<br>Sm_PZQ_35<br>replicate 2 | 25,062,968                                       | 90.07%                                           | 0.04%                                                       |
| Mouse liver<br>Sm_PZQ_35<br>replicate 3 | 26,780,030                                       | 90.27%                                           | 0.03%                                                       |
| Mouse liver<br>Sm_PZQ_39<br>replicate 1 | 28,606,471                                       | 91.03%                                           | 0.02%                                                       |
| Mouse liver<br>Sm_PZQ_39<br>replicate 2 | 27,926,097                                       | 90.19%                                           | 0.03%                                                       |
| Mouse liver<br>Sm_PZQ_39<br>replicate 3 | 26,796,964                                       | 89.65%                                           | 0.03%                                                       |
| Mouse liver<br>Sm_PZQ_46<br>replicate 1 | 24,861,788                                       | 89.77%                                           | 0.01%                                                       |
| Mouse liver<br>Sm_PZQ_46<br>replicate 2 | 27,194,443                                       | 90.84%                                           | 0.02%                                                       |
| Mouse liver<br>Sm_PZQ_46<br>replicate 3 | 27,273,699                                       | 90.19%                                           | 0.03%                                                       |
| Mouse liver<br>ui_Vh_32<br>replicate 1  | 25,530,722                                       | 89.77%                                           | 0.02%                                                       |
| Mouse liver<br>ui_Vh_32<br>replicate 2  | 27,707,093                                       | 89.01%                                           | 0.02%                                                       |

| Sample                                 | Total Reads<br>Quality-trimmed<br>reads (Q > 20) | <i>Mus musculus</i><br>Total mapped<br>reads (%) | <i>Schistosoma<br/>mansoni</i><br>Total mapped<br>reads (%) |
|----------------------------------------|--------------------------------------------------|--------------------------------------------------|-------------------------------------------------------------|
| Mouse liver<br>ui_Vh_32<br>replicate 3 | 29,884,662                                       | 89.31%                                           | 0.02%                                                       |
| Mouse liver<br>ui_Vh_35<br>replicate 1 | 24,735,213                                       | 89.18%                                           | 0.02%                                                       |
| Mouse liver<br>ui_Vh_35<br>replicate 2 | 28,591,287                                       | 90.17%                                           | 0.02%                                                       |
| Mouse liver<br>ui_Vh_35<br>replicate 3 | 27,115,159                                       | 90.06%                                           | 0.01%                                                       |
| Mouse liver<br>ui_Vh_39<br>replicate 1 | 23,688,034                                       | 88.22%                                           | 0.01%                                                       |
| Mouse liver<br>ui_Vh_39<br>replicate 2 | 26,698,924                                       | 89.84%                                           | 0.01%                                                       |
| Mouse liver<br>ui_Vh_39<br>replicate 3 | 25,732,157                                       | 89.41%                                           | 0.01%                                                       |
| Mouse liver<br>ui_Vh_46<br>replicate 1 | 25,245,330                                       | 89.37%                                           | 0.01%                                                       |
| Mouse liver<br>ui_Vh_46<br>replicate 2 | 24,695,867                                       | 89.83%                                           | 0.02%                                                       |
| Mouse liver<br>ui_Vh_46<br>replicate 3 | 25,395,334                                       | 90.05%                                           | 0.01%                                                       |
